# Supplementary material for: Specific detection of methionine 27 mutation in histone 3 variants (H3K27M) in fixed tissue from high-grade astrocytomas
Source: Springer Nature journal article supplement (doi:10.1007/s00401-014-1337-4), 2014-09-08
Supplement: MOESM1 [file 8404660]

**Supplementary Table 1: Other primary brain tumors included in this study with a known wild-type genotype for H3K27**

| Tumor type                                          | n   |
|-----------------------------------------------------|-----|
| Medulloblastoma                                     | 99  |
| Primitive Neuro-ectodermal Tumor                    | 71  |
| Pilomyxoid astrocytoma                              | 1   |
| Ependymoma                                          | 2   |
| Pilocytic astrocytoma<br>(WHO Grade I Astrocytomas) | 115 |
| WHO Grade II Astrocytoma                            | 3   |
